# Supplementary material
Source: MDPI journal article supplement (https://www.mdpi.com/2076-3417/10/19/6785)
Supplement: s1 [file s1]

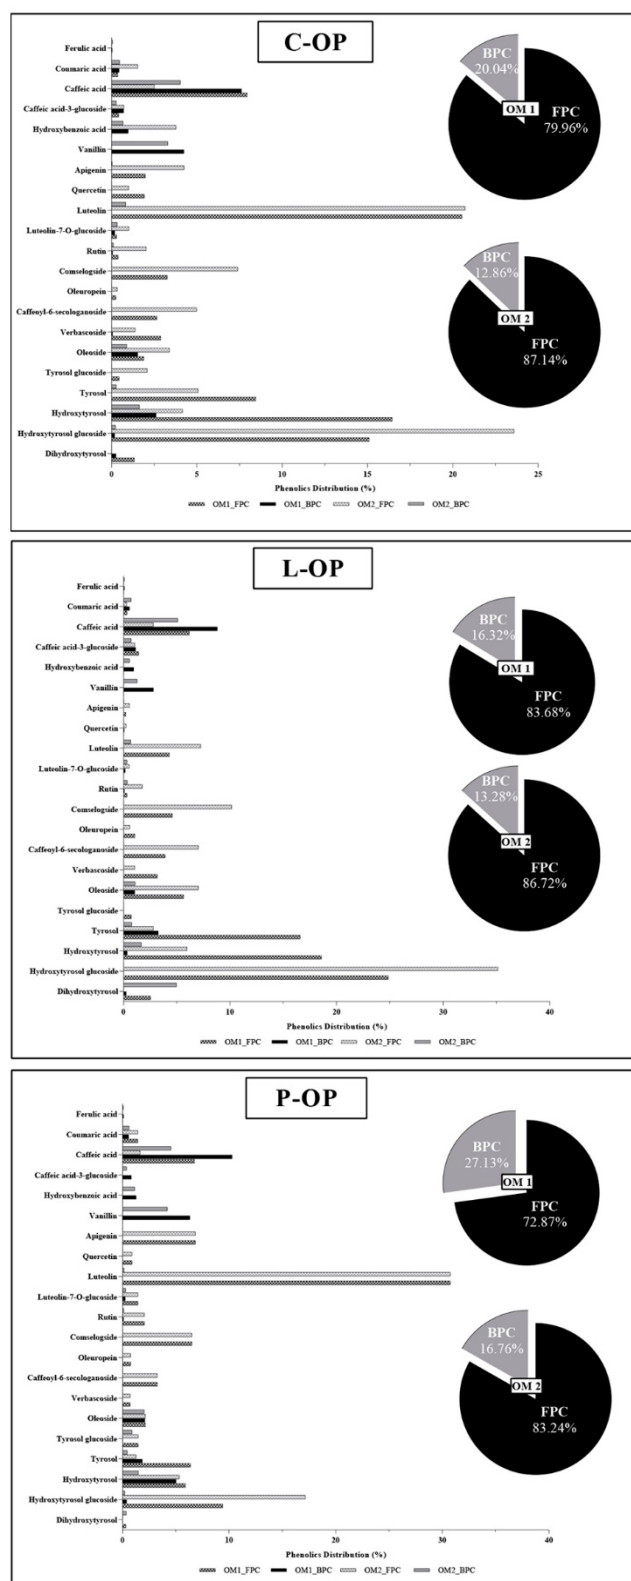

Distribution (in percentage) of the phenolic compounds from crude olive pomace (C-OP), liquid-rich fraction (L-OP) and pulp-rich fraction (P-OP) from olive pomace.  
 OM 1 – Olive pomace from olive mill 1; OM 2 – Olive pomace from olive mill 2; C-OP – Crude olive pomace; L-OP – liquid-rich fraction; P-OP – pulp-rich fraction. Hydroxytyrosol, tyrosol, oleuropein, rutin, luteolin-7-O-glucoside, luteolin, quercetin, apigenin, vanillin, caffeic acid, coumaric acid and ferulic acid were identified by comparison with the standards. The other compounds were tentatively identified by LC-ESI-UHR-QqTOF-MS based on accurate mass, isotope ratio calculations.

**Figure S1.** Distribution (in percentage) of the phenolic compounds from olive pomace and its fractions identified by LC-ESI-UHR-QqTOF-MS.
